# Supplementary material for: Facile modification and fixation of diaryl disulphide-containing dynamic covalent polyesters by iodine-catalysed insertion-like addition reactions of styrene derivatives to disulphide units
Source: Royal Society of Chemistry journal article supplement (doi:10.1039/c6py00963h), 2016-01-01
Supplement: c6py00963h1.pdf [file c6py00963h1.pdf]

## Supporting Information

### **Facile modification and fixation of a diaryl disulphide-containing dynamic covalent polyester by iodine-catalysed insertion-like addition reactions of styrene derivatives to disulphide units**

Yukako Nakai,<sup>a</sup> Akira Takahashi,<sup>a</sup> Raita Goseki<sup>ab</sup> and Hideyuki Otsuka<sup>\*ab</sup>

<sup>a</sup>Department of Organic and Polymeric Materials, <sup>b</sup>Department of Chemical Science and Engineering, Tokyo Institute of Technology, 2-12-1-S1-6 Ookayama, Meguro-ku, Tokyo, 152-8550 (Japan).

Corresponding author: H. Otsuka, E-mail: [otsuka@polymer.titech.ac.jp](mailto:otsuka@polymer.titech.ac.jp)

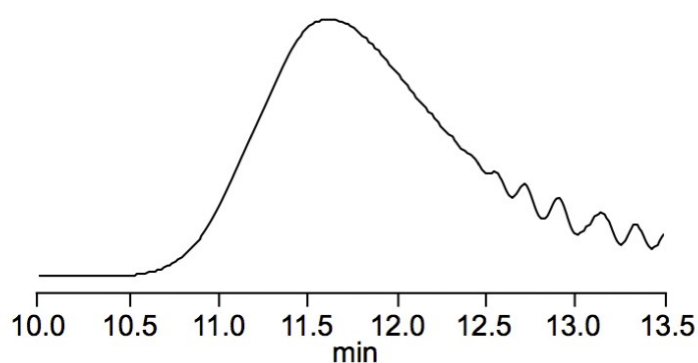

**Figure S1** GPC chart of DADS-PEs.

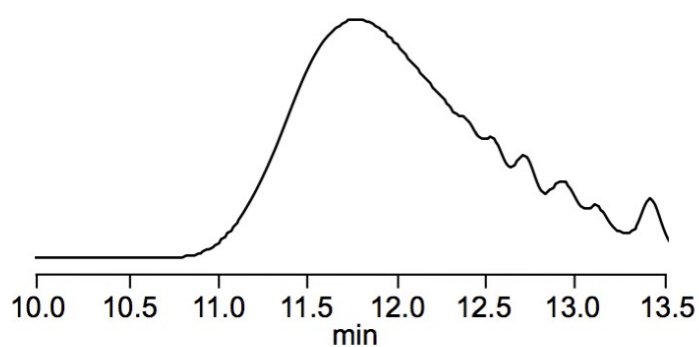

**Figure S2** GPC chart of DADS-StH-PEs.

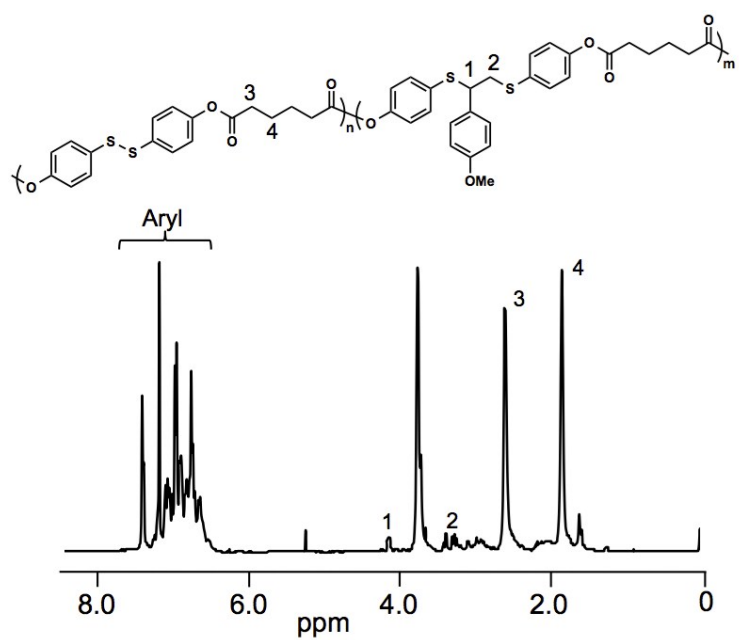

**Fig. S3** <sup>1</sup>H NMR spectrum of DPDS-StOMe-PEs in CDCl<sub>3</sub>.

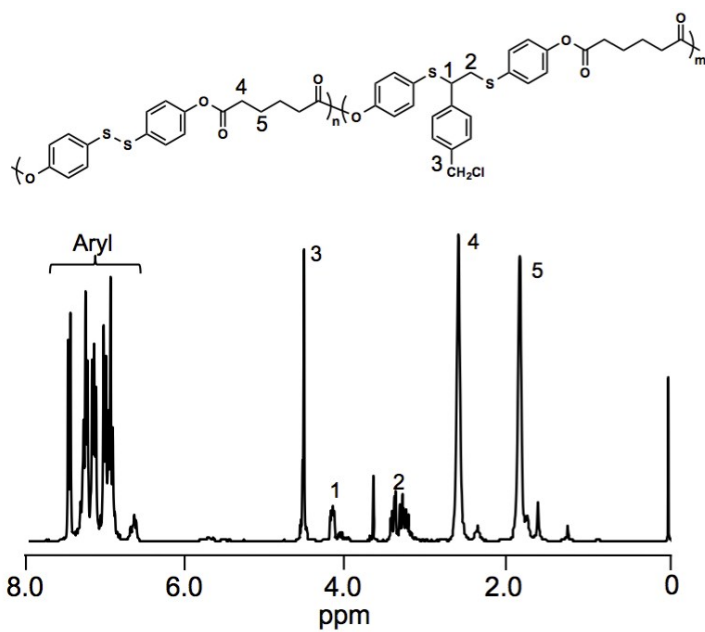

**Fig. S4** <sup>1</sup>H NMR spectrum of DPDS-StCH<sub>2</sub>Cl-PEs in CDCl<sub>3</sub>.

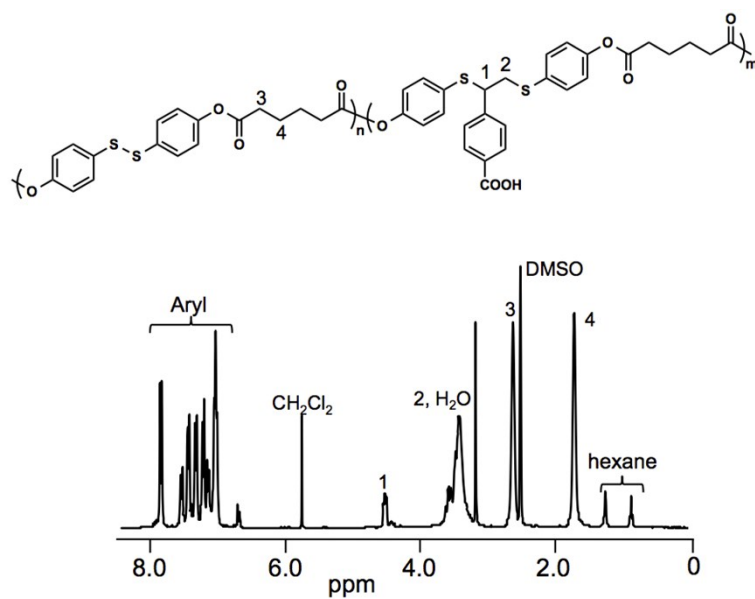

**Fig. S5** <sup>1</sup>H NMR spectrum of DPDS-StCOOH-PEs in DMSO-*d*<sub>6</sub>.

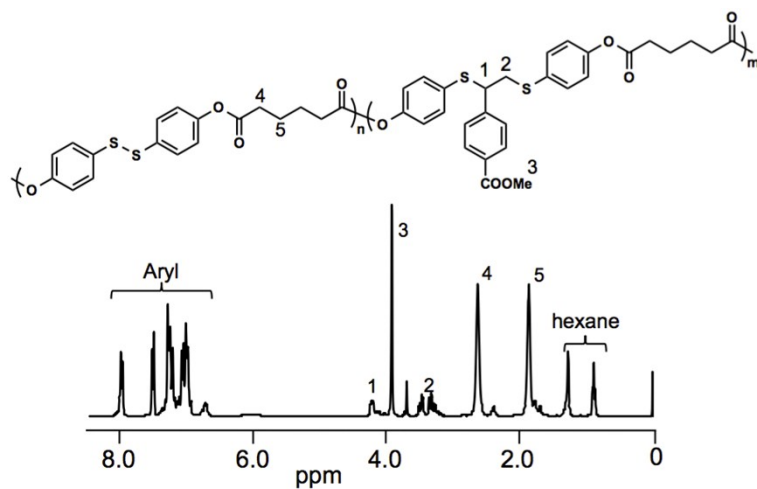

**Fig. S6**  $^1\text{H}$  NMR spectrum of DPDS-StCOOMe-PEs in  $\text{CDCl}_3$ .

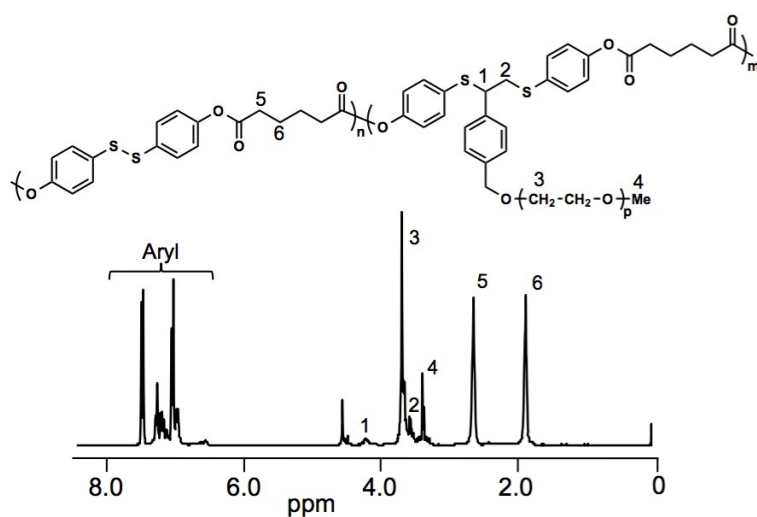

**Fig. S7**  $^1\text{H}$  NMR spectrum of DPDS-St220PEG-PEs in  $\text{CDCl}_3$ .

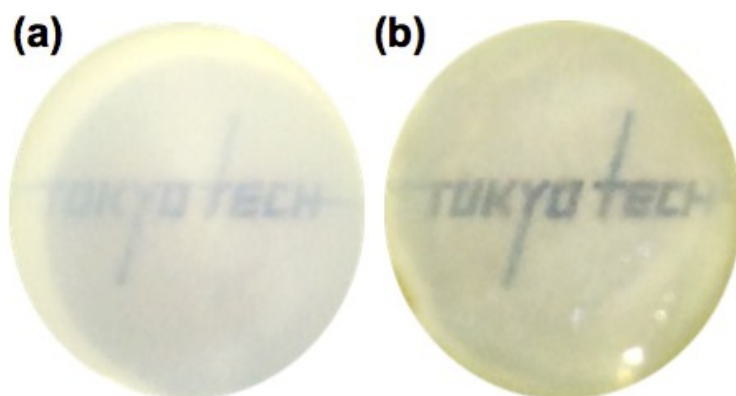

**Fig. S8** The photographs of the films of (a) DADS-PEs and (b) DADS-StCOOMe-PEs.

**Table S1.** The solubility of the polyester before and after the addition reaction to each styrene derivative

| □□□R<br>Solvent   | DADS-PEs | Substituent on styrene moieties after the addition reaction |     |                    |     |       |      |
|-------------------|----------|-------------------------------------------------------------|-----|--------------------|-----|-------|------|
|                   |          | H                                                           | OMe | CH <sub>2</sub> Cl | 4EG | COOMe | COOH |
| CHCl <sub>3</sub> | ++       | ++                                                          | ++  | ++                 | ++  | ++    | -    |
| Acetone           | -        | -                                                           | ++  | +                  | +   | -     | ++   |
| THF               | +        | +                                                           | ++  | ++                 | ++  | ++    | ++   |
| DMF               | +        | +                                                           | ++  | ++                 | ++  | ++    | ++   |

□□-: Insoluble. +: Soluble at elevated temperature. ++: Soluble at room temperature.
